# Supplementary material for: Anion–pyridine-n-oxime interplay to control metal–metal separations in a series of Cu(ii) coordination polymers
Source: Royal Society of Chemistry journal article supplement (doi:10.1039/d2ce01000c), 2022-01-01
Supplement: d2ce01000c1.pdf [file d2ce01000c1.pdf]

## Supporting information for the article

### Anion – pyridine-n-oxime interplay to control metal - metal separations in a series of Cu(II) coordination polymers

**Lilia Croitor** - *Institute of Applied Physics, Academy str., 5 MD2028, Chisinau, Republic of Moldova*; ORCID: **0000-0003-0757-7358** E-mail: [croitor.lilia@gmail.com](mailto:croitor.lilia@gmail.com);

**Eduard B. Coropceanu** - *Tiraspol State University, Iablocikin str. 5, MD2069, Chisinau, Republic of Moldova* ORCID: **0000-0003-1073-828X** E-mail: [coropceanu.eduard@ust.md](mailto:coropceanu.eduard@ust.md);

**Marina S. Fonari** \* – *Institute of Applied Physics, Academy str., 5, MD2028, Chisinau, Republic of Moldova* ; ORCID **0000-0002-2508-5368** E-mail: [marina.fonari@ifa.md](mailto:marina.fonari@ifa.md);  
[fonari.xray@gmail.com](mailto:fonari.xray@gmail.com)

## Experimental

### *Material and methods*

Metal salts, precursors and solvents were purchased from commercial suppliers and used without further purification. Elemental analyses were performed on an Elementar Analysensysteme GmbH Vario El III elemental analyzer.

### *Synthesis of coordination polymers*

**{[Cu(SiF<sub>6</sub>)(4-pyaoH)<sub>4</sub>] dmf 0.5H<sub>2</sub>O}<sub>n</sub> (1)**. To the hot solution of CuF<sub>2</sub> (10 mg, 0.1 mmol) dissolved in 15 mL of water in a glass beaker was added the solution of H<sub>2</sub>suc (12 mg, 0.1 mmol) and 4-pyaoH (24 mg, 0.2 mmol) dissolved in 10 mL of dmf. The resulting mixture was heated and stirred for 20 min, then filtered off and left to evaporate slowly at room temperature. Blue prismatic crystals were then collected from the solution. Yield (based on Cu): ~ 23% (18 mg). Anal. Calc. for C<sub>27</sub>H<sub>32</sub>CuF<sub>6</sub>N<sub>9</sub>O<sub>5.5</sub>Si (%): C, 41.77; H, 4.16; N, 16.25. Found: C, 41.39; H, 4.19; N, 16.12.

**{[Cu(mal)(4-pyaoH)<sub>2</sub>] dmf}<sub>n</sub> (2)** and **{[Cu(mal)<sub>2</sub>](4-pyaoH<sub>2</sub>)<sub>2</sub>]<sub>n</sub> (3)**. CuF<sub>2</sub> (10 mg, 0.1 mmol), H<sub>2</sub>mal (10 mg, 0.1 mmol) and 4-pyaoH (24 mg, 0.2 mmol) were dissolved in a solution of 20 mL water:dmf (1:1). The mixture was heated and stirred for 25 min, then filtered and left to evaporate slowly at room temperature. Deep green needles of **2** were collected from the solution. Yield (based on Cu): ~ 29% (14 mg). Anal. Calc. for C<sub>18</sub>H<sub>21</sub>CuN<sub>5</sub>O<sub>7</sub> (%): C, 44.76; H, 4.38; N, 14.51. Found: C, 44.54; H, 4.23; N, 14.37. Light green plate-like crystals of **3** were collected from the same solution. Yield (based on Cu): ~ 23% (12 mg). Anal. Calc. for C<sub>18</sub>H<sub>18</sub>CuN<sub>4</sub>O<sub>10</sub> (%): C, 42.06; H, 3.53; N, 11.29. Found: C, 41.83; H, 3.27; N, 11.04.

**[Cu(adi)(3-pyaoH)<sub>2</sub>(H<sub>2</sub>O)]<sub>n</sub> (4).** To CuF<sub>2</sub> (10 mg, 0.1 mmol) dissolved in 10 mL of water was added the solution of H<sub>2</sub>adi (15 mg, 0.1 mmol) and 3-pyaoH (24 mg, 0.2 mmol) dissolved in 15 mL of methanol. The resulting mixture was heated and stirred for 20 min, then filtered off and left to evaporate slowly at room temperature. Blue prismatic crystals were then collected from the solution. Yield (based on Cu): ~ 37% (15 mg). Anal. Calc. for C<sub>18</sub>H<sub>22</sub>CuN<sub>4</sub>O<sub>7</sub> (%): C, 45.99; H, 4.72; N, 11.93. Found: C, 45.76; H, 4.64; N, 11.58.

**[Cu(adi)(3-pyaoH)<sub>2</sub>]<sub>n</sub> (5).** The mixture of CuF<sub>2</sub> (10 mg, 0.1 mmol), H<sub>2</sub>adi (15 mg, 0.1 mmol) and 3-pyaoH (24 mg, 0.2 mmol) was dissolved in 30 mL of methanol:dmf (2:1) mixture, heated and stirred for 30 min, then filtered off and left to evaporate slowly at room temperature. Then blue plate-like crystals were collected from the solution. Yield (based on Cu): ~ 31% (14 mg). Anal. Calc. for C<sub>18</sub>H<sub>20</sub>CuN<sub>4</sub>O<sub>6</sub> (%): C, 47.83; H, 4.46; N, 12.39. Found: C, 47.78; H, 4.41; N, 12.27.

**{[Cu(adi)(3-pyaoH)<sub>2</sub>] 0.6MeOH 0.3H<sub>2</sub>O}<sub>n</sub> (6).** The mixture of CuF<sub>2</sub> (10 mg, 0.1 mmol), H<sub>2</sub>adi (15 mg, 0.1 mmol) and 3-pyaoH (24 mg, 0.2 mmol) was dissolved in 40 mL of methanol:water (1:1), heated and stirred for 15 min, then filtered off and left to evaporate slowly at room temperature. Blue plate-like crystals were collected from the solution. Yield (based on Cu): ~ 24% (11 mg). Anal. Calc. for C<sub>18.6</sub>H<sub>23</sub>CuN<sub>4</sub>O<sub>6.9</sub> (%): C, 48.87; H, 4.86; N, 11.76. Found: C, 48.71; H, 4.67; N, 11.62.

**{[Cu(seb)(3-pyaoH)<sub>2</sub>] H<sub>2</sub>seb 2H<sub>2</sub>O}<sub>n</sub> (7).** CuF<sub>2</sub> (10 mg, 0.1 mmol) was dissolved in 20 mL of water by heating and stirring for 10 min. Then to the resulting solution was added solution of H<sub>2</sub>seb (20 mg, 0.1 mmol) and 3-pyaoH (24 mg, 0.2 mmol) in 15 mL methanol. The mixture was heated and stirred for 10 min, then filtered off and left to evaporate slowly at room temperature, resulting in the formation of blue elongated plate-like crystals. Yield (based on Cu): ~ 21% (16 mg). Anal. Calc. for C<sub>32</sub>H<sub>50</sub>CuN<sub>4</sub>O<sub>12</sub> (%): C, 51.50; H, 6.75; N, 7.51. Found: C, 51.27; H, 6.57; N, 7.38.

**[Cu(ClO<sub>4</sub>)(2-pyao)(2-pyaoH)]<sub>n</sub> (8).** To the solution of Cu(ClO<sub>4</sub>)<sub>2</sub>·6H<sub>2</sub>O (37 mg, 0.1 mmol) dissolved in 10 mL water was added methanolic solution (15 mL) of malonic acid (10 mg, 0.1 mmol) and 2-pyaoH (24 mg, 0.2 mmol). The resulting mixture was heated and stirred for 15 min, then filtered off and left to evaporate slowly at room temperature. Blue plate-like crystals were collected from the solution. Yield (based on Cu): ~ 26% (11 mg). Anal. Calc. for C<sub>12</sub>H<sub>11</sub>CuN<sub>4</sub>O<sub>6</sub> (%): C, 35.47; H, 2.73; N, 13.80. Found: C, 35.32; H, 2.67; N, 13.59.

**{[Cu(oxa)(2-pyaoH)] H<sub>2</sub>O}<sub>n</sub> (9).** To the solution of CuF<sub>2</sub> (10 mg, 0.1 mmol) dissolved in 10 mL water was added methanolic solution (15 mL) of H<sub>2</sub>ox (9 mg, 0.1 mmol) and 2-pyaoH (24 mg, 0.1 mmol). The resulting mixture was heated and stirred for 20 min, then filtered off and left to evaporate slowly at room temperature. Green plate-like crystals were collected from the solution. Yield (based on Cu): ~ 41% (12 mg). Anal. Calc. for C<sub>8</sub>H<sub>8</sub>CuN<sub>2</sub>O<sub>6</sub> (%): C, 32.94; H, 2.76; N, 9.61. Found: C, 32.78; H, 2.54; N, 9.43.

**[[Cu<sub>3</sub>(μ<sub>3</sub>-OH)(2-pyao)<sub>3</sub>(fum)]·6.5H<sub>2</sub>O]<sub>n</sub> (**10**). To CuF<sub>2</sub> (10 mg, 0.1 mmol) dissolved in 10 mL water was added 2-pyaoH (24 mg, 0.2 mmol) dissolved in 10 mL methanol. The resulting solution was heated and stirred for 30 min, then added H<sub>2</sub>fum (12 mg, 0.1 mmol) dissolved in 10 mL of methanol. The mixture was heated and stirred for 10 min more, then filtered off and left to evaporate slowly at room temperature. Dark blue plate crystals were collected from the solution. Yield (based on Cu): ~ 18% (14 mg). Anal. Calc. for C<sub>22</sub>H<sub>31</sub>Cu<sub>3</sub>N<sub>6</sub>O<sub>14.5</sub> (%): C, 32.94; H, 3.90; N, 10.48. Found: C, 32.61; H, 3.76; N, 10.37.**

All compounds are soluble in water, methanol, DMF and DMSO.

### ***Crystallographic data collection and structure determination***

Single crystals were mounted on a glass fiber using Paratone oil. Data collections were carried out on an Oxford Diffraction Xcalibur four-circle kappa geometry single-crystal diffractometer with Sapphire 3 CCD detector, using a graphite monochromated MoK $\alpha$  ( $\lambda = 0.71073$  Å) radiation, and applying the CrysAlisPro Software system at 295(2) K. Data reduction, including absorption correction, was done by CrysAlisPro program. The structures were solved by SHELXS program [G.M. Sheldrick, *A short history of SHELX*, *Acta Crystallogr. Sect. A Found. Crystallogr.* **64** (2008) 112–122. <https://doi.org/10.1107/S0108767307043930>]. The coordinates and the anisotropic thermal parameters for all non-hydrogen atoms were refined by full-matrix least-squares methods based on  $F^2$  using the SHELXL program. The C-bound H-atoms were generated geometrically using the riding model with the isotropic factor set 1.2U<sub>eq</sub> of the parent atom, while O-bound H-atoms were found in mixed mode, either located in the difference Fourier map at the final stages of the refinement or generated geometrically using the riding model. The disordering problems were resolved in several structures. In **1** the solvent dmf and water molecules were refined with incomplete occupancies, and H-atoms in these molecules were not found. In **5-7** the oximic group of 3-pyaoH ligand is disordered over two positions, and for the minor components found with the probabilities of 0.062(4) in **5**, 0.115(4) in **6**, and 0.137(4) in **7** the oximic oxygen atom is excluded from Cu(II) coordination. In **8** two oxygen atoms of ClO<sub>4</sub><sup>-</sup> anion that obeys a two-fold symmetry are disordered over two positions with probabilities 0.58(2) and 0.42(2). Crystals **10** displayed poor X-ray diffraction. The repeated trials for the different crystals displayed the identical unit-cell and the best structure solution was found for the twinned crystal. The solved crystal structure was unambiguous although the complete refinement was impossible because of poor crystal quality, so only the crystal model was discussed for **10**. CCDC 2174312 - 2174321 contain the supplementary crystallographic data for this paper. The Figures were produced using MERCURY program [C.F. Macrae, I.J. Bruno, J.A. Chisholm, P.R. Edgington, P. McCabe, E. Pidcock, L. Rodriguez-Monge, R. Taylor, J. Van De Streek, P.A. Wood, *Mercury CSD 2.0 - New features for the visualization and investigation of crystal structures*, *J. Appl. Crystallogr.* **41** (2008) 466–470. <https://doi.org/10.1107/S0021889807067908>].

**Table S1.** Crystal data and structure refinement parameters for compounds **1-10**.

| Compound                                                                    | <b>1</b>                                                                             | <b>2</b>                                                        | <b>3</b>                                                         | <b>4</b>                                                        | <b>5</b>                                                        |
|-----------------------------------------------------------------------------|--------------------------------------------------------------------------------------|-----------------------------------------------------------------|------------------------------------------------------------------|-----------------------------------------------------------------|-----------------------------------------------------------------|
| CCDC numbers                                                                | 2174318                                                                              | 2174316                                                         | 2174312                                                          | 2174314                                                         | 2174319                                                         |
| Empirical formula                                                           | C <sub>27</sub> H <sub>32</sub> CuF <sub>6</sub> N <sub>9</sub> O <sub>5.50</sub> Si | C <sub>18</sub> H <sub>21</sub> CuN <sub>5</sub> O <sub>7</sub> | C <sub>18</sub> H <sub>18</sub> CuN <sub>4</sub> O <sub>10</sub> | C <sub>18</sub> H <sub>22</sub> CuN <sub>4</sub> O <sub>7</sub> | C <sub>18</sub> H <sub>20</sub> CuN <sub>4</sub> O <sub>6</sub> |
| Formula weight                                                              | 776.24                                                                               | 482.94                                                          | 513.90                                                           | 469.93                                                          | 451.92                                                          |
| Crystal system                                                              | Tetragonal                                                                           | Orthorhombic                                                    | Triclinic                                                        | Monoclinic                                                      | Monoclinic                                                      |
| Space group                                                                 | <i>P4/ncc</i>                                                                        | <i>Pna2<sub>1</sub></i>                                         | <i>P-1</i>                                                       | <i>C2/c</i>                                                     | <i>P2<sub>1</sub>/c</i>                                         |
| <i>a</i> , Å                                                                | 16.1144(6)                                                                           | 7.5251(3)                                                       | 5.1679(7)                                                        | 15.9487(9)                                                      | 7.9490(4)                                                       |
| <i>b</i> , Å                                                                | 16.1144(6)                                                                           | 14.0673(6)                                                      | 10.3878(18)                                                      | 6.1547(4)                                                       | 14.2074(10)                                                     |
| <i>c</i> , Å                                                                | 16.2242(10)                                                                          | 20.2503(7)                                                      | 10.5431(14)                                                      | 21.6085(10)                                                     | 8.5744(4)                                                       |
| $\alpha$ , °                                                                | 90                                                                                   | 90                                                              | 113.875(15)                                                      | 90                                                              | 90                                                              |
| $\beta$ , °                                                                 | 90                                                                                   | 90                                                              | 90.888(11)                                                       | 107.375(5)                                                      | 97.604(4)                                                       |
| $\gamma$ , °                                                                | 90                                                                                   | 90                                                              | 99.321(12)                                                       | 90                                                              | 90                                                              |
| <i>V</i> , Å <sup>3</sup>                                                   | 4213.0(4)                                                                            | 2143.65(15)                                                     | 508.66(14)                                                       | 2024.3(2)                                                       | 959.83(9)                                                       |
| <i>Z</i>                                                                    | 4                                                                                    | 4                                                               | 1                                                                | 4                                                               | 2                                                               |
| <i>D</i> (calcd) Mg/m <sup>3</sup>                                          | 1.224                                                                                | 1.496                                                           | 1.678                                                            | 1.542                                                           | 1.564                                                           |
| $\mu$ , mm <sup>-1</sup>                                                    | 0.616                                                                                | 1.068                                                           | 1.141                                                            | 1.128                                                           | 1.182                                                           |
| <i>F</i> (000)                                                              | 1592                                                                                 | 996                                                             | 263                                                              | 972                                                             | 466                                                             |
| Reflections collected                                                       | 8773                                                                                 | 4794                                                            | 2673                                                             | 3112                                                            | 3142                                                            |
| Independent reflections                                                     | 1850<br>[ <i>R</i> (int)=0.0750]                                                     | 3293<br>[ <i>R</i> (int)=0.0291]                                | 1780<br>[ <i>R</i> (int)=0.0402]                                 | 1770<br>[ <i>R</i> (int)=0.0284]                                | 1679<br>[ <i>R</i> (int)=0.0223]                                |
| Data / restraints / parameters                                              | 1850 / 42 / 152                                                                      | 3293 / 2 / 285                                                  | 1780 / 0 / 151                                                   | 1770 / 0 / 140                                                  | 1679 / 0 / 139                                                  |
| GOF on <i>F</i> <sup>2</sup>                                                | 1.037                                                                                | 0.994                                                           | 1.005                                                            | 1.047                                                           | 1.057                                                           |
| <i>R</i> <sub>1</sub> , <i>wR</i> <sub>2</sub> ( <i>I</i> > 2σ( <i>I</i> )) | 0.0636, 0.1195                                                                       | 0.0415, 0.0914                                                  | 0.0492, 0.1048                                                   | 0.0390, 0.0901                                                  | 0.0384, 0.0929                                                  |
| <i>R</i> <sub>1</sub> , <i>wR</i> <sub>2</sub> (all data)                   | 0.1591, 0.1875                                                                       | 0.0556, 0.1000                                                  | 0.0692, 0.1147                                                   | 0.0481, 0.0963                                                  | 0.0509, 0.1018                                                  |
| $\Delta\rho_{\max}/\Delta\rho_{\min}$ (e·Å <sup>-3</sup> )                  | 0.408 / -0.247                                                                       | 0.305 / -0.249                                                  | 0.334 / -0.426                                                   | 0.444 / -0.266                                                  | 0.309 / -0.249                                                  |

**Table S1** (continuation).

| Compound                                                                     | <b>6</b>                                                              | <b>7</b>                                                         | <b>8</b>                                                           | <b>9</b>                                                      | <b>10</b>                                                                            |
|------------------------------------------------------------------------------|-----------------------------------------------------------------------|------------------------------------------------------------------|--------------------------------------------------------------------|---------------------------------------------------------------|--------------------------------------------------------------------------------------|
| CCDC numbers                                                                 | 2174321                                                               | 2174313                                                          | 2174315                                                            | 2174317                                                       | 2174320                                                                              |
| Empirical formula                                                            | C <sub>18.60</sub> H <sub>23</sub> CuN <sub>4</sub> O <sub>6.90</sub> | C <sub>32</sub> H <sub>50</sub> CuN <sub>4</sub> O <sub>12</sub> | C <sub>12</sub> H <sub>11</sub> ClCu N <sub>4</sub> O <sub>6</sub> | C <sub>8</sub> H <sub>8</sub> CuN <sub>2</sub> O <sub>6</sub> | C <sub>22</sub> H <sub>31</sub> Cu <sub>3</sub> N <sub>6</sub> O <sub>14</sub><br>50 |
| Formula weight                                                               | 476.55                                                                | 746.30                                                           | 406.24                                                             | 291.70                                                        | 802.15                                                                               |
| Crystal system                                                               | Triclinic                                                             | Triclinic                                                        | Orthorhombic                                                       | Monoclinic                                                    | Monoclinic                                                                           |
| Space group                                                                  | <i>P</i> -1                                                           | <i>P</i> -1                                                      | <i>Pccn</i>                                                        | <i>P</i> 2 <sub>1</sub> / <i>c</i>                            | <i>P</i> 2 <sub>1</sub> / <i>c</i>                                                   |
| <i>a</i> , Å                                                                 | 8.0458(7)                                                             | 8.2351(7)                                                        | 7.0897(5)                                                          | 8.9697(4)                                                     | 10.4648(12)                                                                          |
| <i>b</i> , Å                                                                 | 8.4741(6)                                                             | 10.7703(10)                                                      | 12.7224(7)                                                         | 14.8584(5)                                                    | 17.6569(18)                                                                          |
| <i>c</i> , Å                                                                 | 8.6258(6)                                                             | 11.2831(9)                                                       | 17.1140(11)                                                        | 7.6158(4) Å                                                   | 16.962(2)                                                                            |
| $\alpha$ , °                                                                 | 84.174(6)                                                             | 71.752(8)                                                        | 90                                                                 | 90                                                            | 90                                                                                   |
| $\beta$ , °                                                                  | 62.420(8)                                                             | 77.454(7)                                                        | 90                                                                 | 102.409(5)                                                    | 96.147(11)                                                                           |
| $\gamma$ , °                                                                 | 82.413(7)                                                             | 74.439(8)                                                        | 90                                                                 | 90                                                            | 90                                                                                   |
| <i>V</i> , Å <sup>3</sup>                                                    | 516.18(8)                                                             | 905.83(15)                                                       | 1543.65(17)                                                        | 991.29(7)                                                     | 3116.2(6)                                                                            |
| <i>Z</i>                                                                     | 1                                                                     | 1                                                                | 4                                                                  | 4                                                             | 4                                                                                    |
| <i>D</i> (calcd) Mg/m <sup>3</sup>                                           | 1.533                                                                 | 1.368                                                            | 1.748                                                              | 1.955                                                         | 1.710                                                                                |
| $\mu$ , mm <sup>-1</sup>                                                     | 1.106                                                                 | 0.668                                                            | 1.626                                                              | 2.224                                                         | 2.105                                                                                |
| <i>F</i> (000)                                                               | 247                                                                   | 395                                                              | 820                                                                | 588                                                           | 1632                                                                                 |
| Reflections collected                                                        | 2887                                                                  | 5520                                                             | 3216                                                               | 3235                                                          | 7024                                                                                 |
| Independent reflections                                                      | 1810<br>[ <i>R</i> (int)=0.0239]                                      | 3532<br>[ <i>R</i> (int)=0.0286]                                 | 1364<br>[ <i>R</i> (int)=0.0222]                                   | 1736<br>[ <i>R</i> (int)=0.0285]                              | 3226<br>[ <i>R</i> (int)=0.0859]                                                     |
| Data / restraints / parameters                                               | 1810 / 1 / 154                                                        | 3532 / 4 / 239                                                   | 1364 / 12 / 132                                                    | 1736 / 3 / 160                                                | 3226 / 277 / 369                                                                     |
| GOF on <i>F</i> <sup>2</sup>                                                 | 1.076                                                                 | 1.026                                                            | 1.020                                                              | 1.017                                                         | 1.087                                                                                |
| <i>R</i> <sub>1</sub> , w <i>R</i> <sub>2</sub> ( <i>I</i> > 2σ( <i>I</i> )) | 0.0398, 0.0995                                                        | 0.0524, 0.0991                                                   | 0.0350, 0.0747                                                     | 0.0359, 0.0869                                                | 0.1645, 0.3106                                                                       |
| <i>R</i> <sub>1</sub> , w <i>R</i> <sub>2</sub> (all data)                   | 0.0446, 0.1034                                                        | 0.0742, 0.1104                                                   | 0.0597, 0.0859                                                     | 0.0466, 0.0925                                                | 0.2290, 0.3441                                                                       |
| $\Delta\rho_{\max}/\Delta\rho_{\min}$ (e·Å <sup>-3</sup> )                   | 0.562 /-0.271                                                         | 0.314 /-0.233                                                    | 0.251 /-0.200                                                      | 0.485 /-0.378                                                 | 1.961 /-1.126                                                                        |

**Table S2.** Bond lengths [Å] and angles [°] for **1-9**.

| <b>1</b>                                                                          |           |              |           |
|-----------------------------------------------------------------------------------|-----------|--------------|-----------|
| Cu(1)-N(1)                                                                        | 2.015(4)  | Cu(1)-F(1)   | 2.320(5)  |
| Cu(1)-N(1)#1                                                                      | 2.015(4)  | Si-F(1)      | 1.681(5)  |
| Cu(1)-N(1)#3                                                                      | 2.015(4)  | Si-F(2)      | 1.681(2)  |
| Cu(1)-N(1)#2                                                                      | 2.015(4)  | Si-F(3)      | 1.681(2)  |
| N(1)-Cu(1)-F(1)                                                                   | 89.78(10) | F(1)-Si-F(3) | 180.0     |
| N(1)-Cu(1)-N(1)#2                                                                 | 89.999(1) | F(2)-Si-F(1) | 89.60(11) |
| N(1)-Cu(1)-N(1)#1                                                                 | 179.6(2)  | F(2)-Si-F(3) | 90.40(11) |
| Symmetry transformations used to generate equivalent atoms: #1 -x+1/2, -y+1/2, z; |           |              |           |

|                                                                                  |            |                   |            |
|----------------------------------------------------------------------------------|------------|-------------------|------------|
| #2 y, -x+1/2, z ; #3 -y+1/2, x, z                                                |            |                   |            |
| <b>2</b>                                                                         |            |                   |            |
| Cu(1)-O(5)                                                                       | 1.926(4)   | Cu(1)-N(1)        | 2.023(5)   |
| Cu(1)-O(3)                                                                       | 1.946(4)   | Cu(1)-O(4)#1      | 2.227(5)   |
| Cu(1)-N(3)                                                                       | 2.016(4)   |                   |            |
| O(5)-Cu(1)-O(3)                                                                  | 91.59(19)  | O(5)-Cu(1)-N(1)   | 151.2(2)   |
| O(5)-Cu(1)-N(3)                                                                  | 90.5(2)    | O(3)-Cu(1)-N(1)   | 86.7(2)    |
| O(3)-Cu(1)-N(3)                                                                  | 177.53(19) | N(3)-Cu(1)-N(1)   | 92.2(2)    |
| Symmetry transformations used to generate equivalent atoms: #1 x+1/2, -y+1/2, z  |            |                   |            |
| <b>3</b>                                                                         |            |                   |            |
| Cu(1)-O(1)                                                                       | 1.904(2)   | Cu(1)-O(3)        | 1.927(2)   |
| O(1)-Cu(1)-O(3)                                                                  | 94.21(10)  | O(1)#1-Cu(1)-O(3) | 85.79(10)  |
| O(3)-Cu(1)-O(3)                                                                  | 180.0      |                   |            |
| Symmetry transformations used to generate equivalent atoms: #1 -x+1, -y, -z+1    |            |                   |            |
| <b>4</b>                                                                         |            |                   |            |
| Cu(1)-O(2)                                                                       | 1.9353(17) | Cu(1)-N(1)        | 2.057(2)   |
| Cu(1)-O(1W)                                                                      | 2.291(4)   |                   |            |
| O(2)#1-Cu(1)-O(2)                                                                | 174.43(12) | N(1)#1-Cu(1)-N(1) | 164.54(14) |
| O(2)-Cu(1)-N(1)#1                                                                | 89.28(8)   | O(2)-Cu(1)-O(1W)  | 87.22(6)   |
| O(2)-Cu(1)-N(1)                                                                  | 91.47(8)   | N(1)-Cu(1)-O(1W)  | 97.73(7)   |
| Symmetry transformations used to generate equivalent atoms: #1 -x+1, y, -z+1/2   |            |                   |            |
| <b>5</b>                                                                         |            |                   |            |
| Cu(1)-O(2)                                                                       | 1.9297(19) | Cu(1)-N(1)        | 2.041(2)   |
| O(2)-Cu(1)-N(1)                                                                  | 91.22(8)   | O(2)#1-Cu(1)-N(1) | 88.78(8)   |
| Symmetry transformations used to generate equivalent atoms: #1 -x+1, -y+2, -z    |            |                   |            |
| <b>6</b>                                                                         |            |                   |            |
| Cu(1)-O(2)                                                                       | 1.942(2)   | Cu(1)-N(1)        | 2.029(2)   |
| O(2)-Cu(1)-N(1)                                                                  | 89.08(9)   | O(2)-Cu(1)-N(1)#1 | 90.92(9)   |
| Symmetry transformations used to generate equivalent atoms: #1 -x+2, -y, -z+1    |            |                   |            |
| <b>7</b>                                                                         |            |                   |            |
| Cu(1)-O(2)                                                                       | 1.9387(17) | Cu(1)-N(1)        | 2.019(2)   |
| O(2)-Cu(1)-N(1)                                                                  | 89.04(8)   | O(2)-Cu(1)-N(1)#1 | 90.96(8)   |
| Symmetry transformations used to generate equivalent atoms: #1 -x, -y, -z+1      |            |                   |            |
| <b>8</b>                                                                         |            |                   |            |
| Cu(1)-N(2)                                                                       | 1.980(3)   | Cu(1)-O(2)        | 2.471(15)  |
| Cu(1)-N(1)                                                                       | 2.024(3)   |                   |            |
| N(2)-Cu(1)-N(2)#1                                                                | 91.58(18)  | N(2)-Cu(1)-O(2)   | 96.3(6)    |
| N(2)-Cu(1)-N(1)                                                                  | 80.75(12)  | N(2)#1-Cu(1)-O(2) | 95.9(4)    |
| N(2)#1-Cu(1)-N(1)                                                                | 168.60(10) | N(1)-Cu(1)-O(2)   | 93.3(3)    |
| Symmetry transformations used to generate equivalent atoms: #1 -x+1/2, -y+3/2, z |            |                   |            |
| <b>9</b>                                                                         |            |                   |            |
| Cu(1)-O(5)                                                                       | 1.925(2)   | Cu(1)-N(2)        | 2.025(2)   |

|                                                                               |            |                   |           |
|-------------------------------------------------------------------------------|------------|-------------------|-----------|
| Cu(1)-O(2)                                                                    | 1.948(2)   | Cu(1)-O(3)#1      | 2.359(2)  |
| Cu(1)-N(1)                                                                    | 1.970(3)   |                   |           |
| O(5)-Cu(1)-O(2)                                                               | 85.00(9)   | O(5)-Cu(1)-O(3)#1 | 95.08(9)  |
| O(5)-Cu(1)-N(1)                                                               | 170.99(11) | O(2)-Cu(1)-O(3)#1 | 90.50(9)  |
| O(2)-Cu(1)-N(1)                                                               | 95.72(10)  | N(1)-Cu(1)-O(3)#1 | 93.89(10) |
| O(5)-Cu(1)-N(2)                                                               | 97.98(10)  | N(2)-Cu(1)-O(3)#1 | 96.30(10) |
| O(2)-Cu(1)-N(2)                                                               | 172.28(10) | N(1)-Cu(1)-N(2)   | 80.22(10) |
| Symmetry transformations used to generate equivalent atoms: #1 x,-y+3/2,z+1/2 |            |                   |           |

**Table S3.** Hydrogen bonds for **1-7** and **9** [Å and °].

| D-H...A            | H...A, Å | D...A, Å  | ∠D-H...A, ° | Symmetry transformation for acceptor |
|--------------------|----------|-----------|-------------|--------------------------------------|
| <b>1</b>           |          |           |             |                                      |
| O(1)-H(1)···F(2)   | 1.99     | 2.723(5)  | 148.5       | -y, -x, -z+1/2                       |
| O(1)-H(1)···F(2)   | 2.37     | 2.942(4)  | 127.2       | x-1/2, -y, -z+1/2                    |
| <b>2</b>           |          |           |             |                                      |
| O(1)-H(1)···O(6)   | 1.94(4)  | 2.801(8)  | 165(11)     | -x+1/2, y-1/2, z+1/2                 |
| O(2)-H(2)···O(1K)  | 1.86     | 2.660(10) | 166.1       | -x+5/2, y+1/2, z+1/2                 |
| <b>3</b>           |          |           |             |                                      |
| O(5)-H(5)···O(2)   | 1.82     | 2.611(4)  | 162.3       | x+1, y, z                            |
| N(1)-H(1)···O(1)   | 2.57     | 3.139(4)  | 124.1       | -x, -y, -z                           |
| N(1)-H(1)···O(3)   | 1.95     | 2.790(4)  | 165.9       | x-1, y, z-1                          |
| <b>4</b>           |          |           |             |                                      |
| O(1W)-H(1W)···O(3) | 2.158    | 2.891     | 170.67      | -x+1, y+1, -z+1/2                    |
| O(1)-H(1O1)···O(3) | 1.916    | 2.720(3)  | 166.64      | -x+1/2, -y+1/2, -z                   |
| <b>5</b>           |          |           |             |                                      |
| O(1)-H(1)···O(3)   | 1.76     | 2.554(3)  | 163.6       | -x, 2-y, -z                          |
| <b>6</b>           |          |           |             |                                      |
| O(1)-H(1)···O(3)   | 1.75     | 2.547(3)  | 163.6       | x-1, y, z                            |
| <b>7</b>           |          |           |             |                                      |
| O(1)-H(1)···O(3)   | 1.83     | 2.638(3)  | 167.7       | x+1, y, z                            |
| O(5)-H(5)···O(3)   | 1.77     | 2.577(3)  | 166.5       | -x, -y+1, -z+1                       |
| O(1W)-H(1X)···O(5) | 2.25(3)  | 2.989(3)  | 143(5)      | -x+1, -y+1, -z                       |
| O(1W)-H(2X)···O(4) | 2.03(3)  | 2.826(4)  | 153(5)      |                                      |
| <b>9</b>           |          |           |             |                                      |
| O(1)-H(1)···O(1W)  | 1.78     | 2.556(4)  | 157.8       | -x+1, -y+2, -z+1                     |
| O(1W)-H(1W)···O(4) | 2.16(5)  | 2.746(4)  | 138(6)      | x, y, z+1                            |
| O(1W)-H(2W)···O(5) | 2.13(5)  | 2.737(4)  | 137(5)      | -x+1, -y+2, -z+1                     |

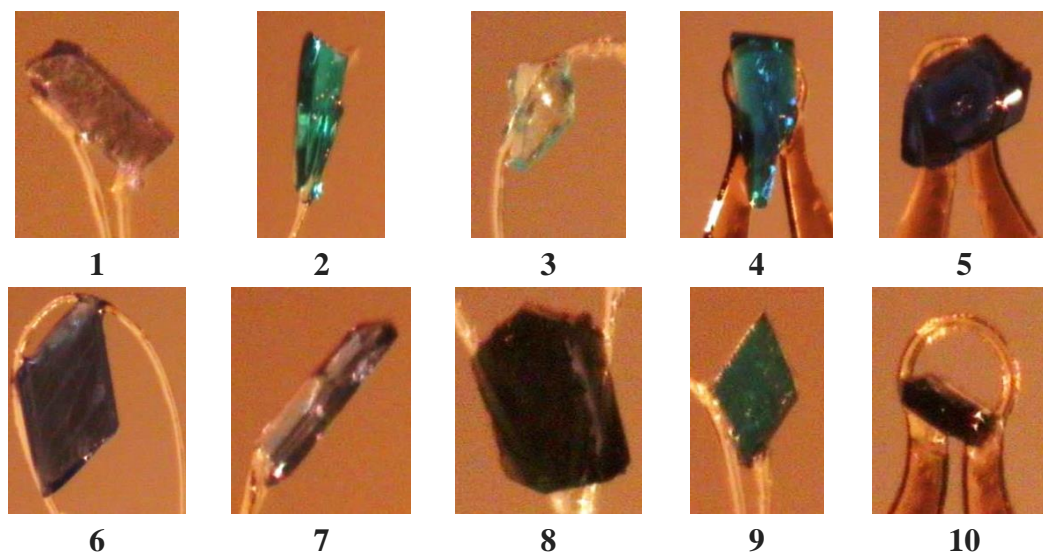

**Figure S1.** Images of crystals 1-10

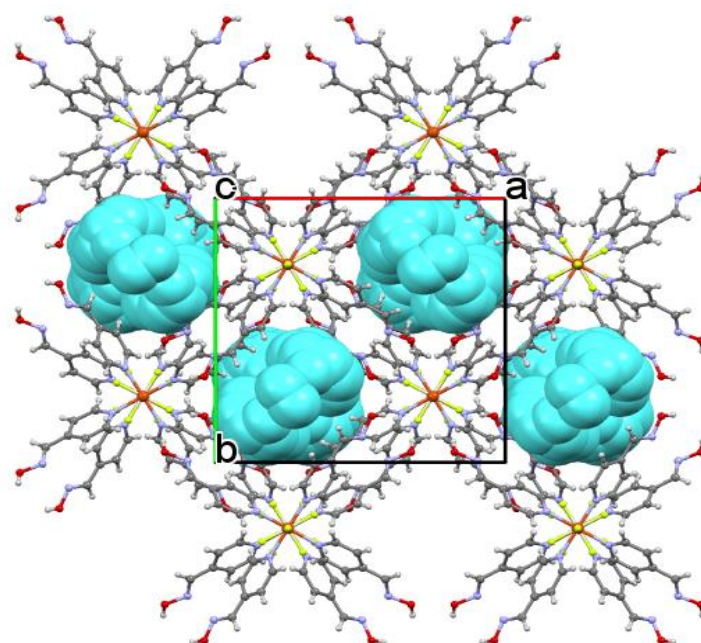

**Figure S2.** Crystal packing in  $\{[\text{Cu}(\text{SiF}_6)(4\text{-pyaoH})_4]\cdot\text{dmf}\cdot 0.5\text{H}_2\text{O}\}_n$  (**1**) showing the association of coordination chains in the 3D H-bonded network *via*  $\text{OH}(3\text{-pyaoH})\cdots\text{F}$  hydrogen bonds with entrapping dmf and water solvents depicted as cyan space-filling models.



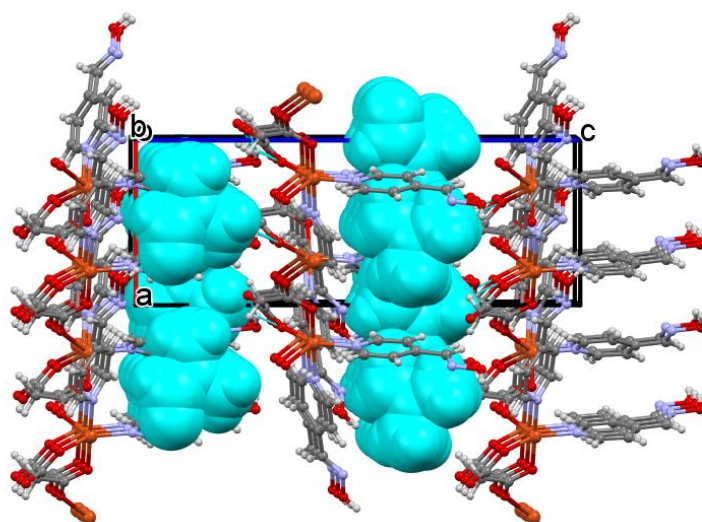

**Figure S3.** Crystal packing in  $\{[\text{Cu}(\text{mal})(4\text{-pyaoH})_2]\cdot\text{dmf}\}_n$  (**2**) with entrapped dmf solvent molecules depicted as cyan space-filling models.

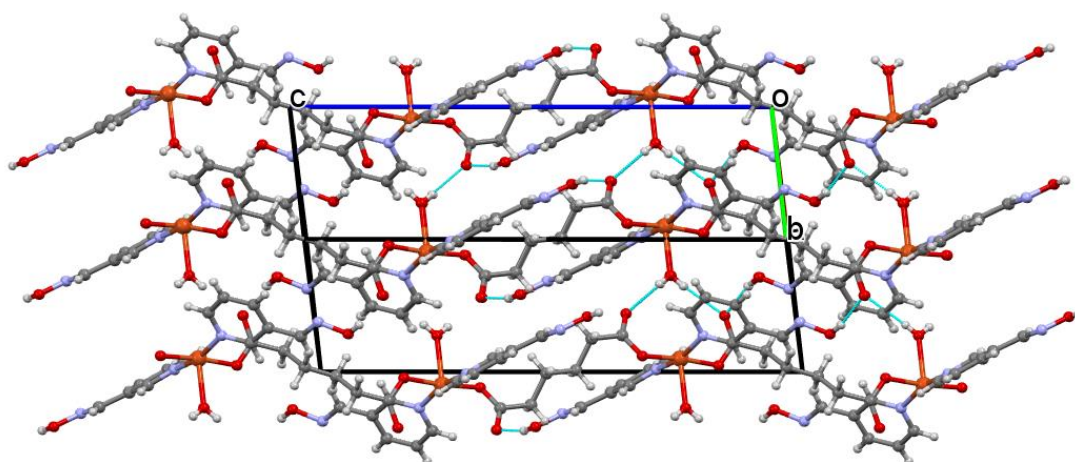

**Figure S4.** Crystal packing in  $[\text{Cu}(\text{adi})(3\text{-pyaoH})_2(\text{H}_2\text{O})]_n$  (**4**) showing the interconnection of coordination chains in the 3D H-bonded network *via*  $\text{OH}(3\text{-pyaoH})\cdots\text{O}(\text{adi})$  and  $\text{OH}(\text{H}_2\text{O})\cdots\text{O}(\text{adi})$  hydrogen bonds.

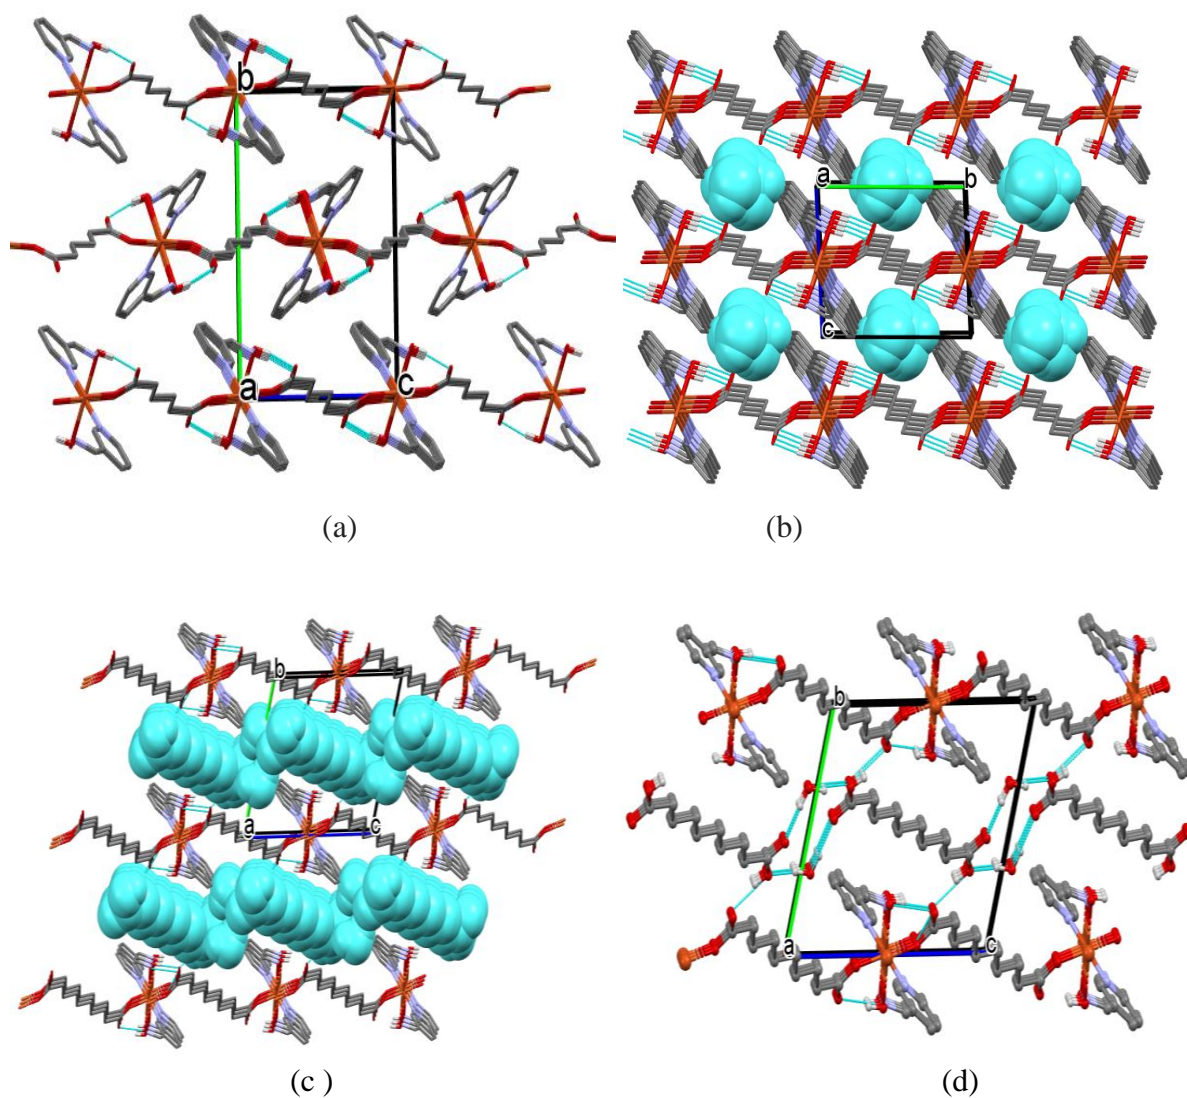

**Figure S5.** (a) Packing of coordination layers in **5**. (b) Packing of coordination layers in **6**. The accommodated MeOH and H<sub>2</sub>O solvents are depicted as cyan space-filling models. (c) Packing of coordination layers in **7**. The accommodated H<sub>2</sub>seb and H<sub>2</sub>O guest molecules are depicted as cyan space-filling models. (d) View of H<sub>2</sub>seb...H<sub>2</sub>O infinite H-bonded chains situated in the interlayer space in **7**.
